# Supplementary material for: Efficacy and safety of eltrombopag in persistent and newly diagnosed ITP in clinical practice
Source: Springer Nature journal article supplement (doi:10.1007/s12185-017-2275-4), 2017-06-30
Supplement: MOESM1 [file 12496426]

**ADDITIONAL MATERIALS:**

1. Manuscript number: IJHM-D-17-0034R1
2. Manuscript title: “Efficacy and safety of eltrombopag in persistent and newly-diagnosed ITP in clinical practice”
3. Name of authors (before the change):

Tomás José González-López1, Fernando Fernández-Fuentes2, José Angel Hernández-Rivas3, Blanca Sánchez-González4, Violeta Martínez-Robles5, María Teresa Alvarez-Román6, Gloria Pérez-Rus7, Cristina Pascual7, Silvia Bernat8, Rosa Fisac9, Carlos Aguilar10, Abelardo Bárez11, María Jesús Peñarrubia12, Pavel Olivera13, Angeles Fernández-Rodríguez14, Erik de Cabo15, Luis Javier García-Frade16 and José Ramón González-Porras17

1 Department of Hematology, Hospital Universitario de Burgos, Burgos, Spain; 2 Department of Hematology, Hospital Universitario Insular de Gran Canaria, Las Palmas de Gran Canaria, Spain; 3 Department of Hematology, Hospital Infanta Leonor, Madrid, Spain; 4 Department of Hematology, Hospital del Mar, Barcelona, Spain; 5 Department of Hematology, Hospital de León, León, Spain; 6 Department of Hematology, Hospital Universitario La Paz, Madrid, Spain; 7 Department of Hematology, Hospital General Universitario Gregorio Marañón, Madrid, Spain; 8 Department of Hematology, Hospital de La Plana, Castellón, Spain; 9 Department of Hematology, Hospital de Segovia, Segovia, Spain; 10 Department of Hematology, Hospital de Soria, Soria, Spain; 11 Department of Hematology, Hospital de Avila, Avila, Spain; 12 Department of Hematology, Hospital Clínico de Valladolid, Valladolid, Spain; 13 Department of Hematology, Hospital Universitario Vall de Hebron, Barcelona, Spain; 14 Department of Hematology, Hospital Universitario Central de Asturias, Oviedo (Asturias), Spain; 15 Department of Hematology, Hospital del Bierzo, Ponferrada (León), Spain; 16 Department of Hematology, Hospital Universitario Río Hortega, Valladolid, Spain; 17 Department of Hematology, IBSAL-Hospital Universitario de Salamanca, Salamanca, Spain.

1. Name of authors (after the change):

Tomás José González-López1, Fernando Fernández-Fuentes2, José Angel Hernández-Rivas3, Blanca Sánchez-González4, Violeta Martínez-Robles5, María Teresa Alvarez-Román6, Gloria Pérez-Rus7, Cristina Pascual7, Silvia Bernat8, Esther Arrieta-Cerdán9, Carlos Aguilar10, Abelardo Bárez11, María Jesús Peñarrubia12, Pavel Olivera13, Angeles Fernández-Rodríguez14, Erik de Cabo15, Luis Javier García-Frade16 and José Ramón González-Porras17

1 Department of Hematology, Hospital Universitario de Burgos, Burgos, Spain; 2 Department of Hematology, Hospital Universitario Insular de Gran Canaria, Las Palmas de Gran Canaria, Spain; 3 Department of Hematology, Hospital Infanta Leonor, Madrid, Spain; 4 Department of Hematology, Hospital del Mar, Barcelona, Spain; 5 Department of Hematology, Hospital de León, León, Spain; 6 Department of Hematology, Hospital Universitario La Paz, Madrid, Spain; 7 Department of Hematology, Hospital General Universitario Gregorio Marañón, Madrid, Spain; 8 Department of Hematology, Hospital de La Plana, Castellón, Spain; 9 Department of Statistics,Hospital Universitario de Burgos, Burgos, Spain; 10 Department of Hematology, Hospital de Soria, Soria, Spain; 11 Department of Hematology, Hospital de Avila, Avila, Spain; 12 Department of Hematology, Hospital Clínico de Valladolid, Valladolid, Spain; 13 Department of Hematology, Hospital Universitario Vall de Hebron, Barcelona, Spain; 14 Department of Hematology, Hospital Universitario Central de Asturias, Oviedo (Asturias), Spain; 15 Department of Hematology, Hospital del Bierzo, Ponferrada (León), Spain; 16 Department of Hematology, Hospital Universitario Río Hortega, Valladolid, Spain; 17 Department of Hematology, IBSAL-Hospital Universitario de Salamanca, Salamanca, Spain.

1. Reasons for the changes in authorship: Dra. Fisac has no email neither pone available. She is not working now and she has not responded to numerous emails of me regarding this manuscript topic. So we regret not to include her as an autor in final publication. On the other hand, Dr. Arrieta-Cerdán has helped with some minor but important technical issues.
2. Signature of all authors: All authors of definitive versión of the paper but Dra. Arrieta-Cerdán have previously agreed to the publication with an electronic signature. It can be observed this in the homepage of the journal. Dra. Arrieta-Cerdán is about to sign this very afternoon, after receiving invitation-to-sign email.
3. Changes to the former text are now indicated in red.
